# Supplementary material for: A robust aluminum-octacarboxylate framework with scu topology for selective capture of sulfur dioxide
Source: Royal Society of Chemistry journal article supplement (doi:10.1039/d4sc01877j), 2024-01-01
Supplement: d4sc01877j1.pdf [file d4sc01877j1.pdf]

## Supporting Information

### **A Robust Aluminum-Octacarboxylate Framework with scu Topology for Selective Capture of Sulfur Dioxide**

Liang Yu,<sup>‡a,b</sup> Meng He,<sup>‡c</sup> Jinze Yao,<sup>‡a</sup> Qibin Xia,<sup>\*a</sup> Sihai Yang,<sup>\*c,d</sup> Jing Li,<sup>\*e,b</sup> and Hao Wang<sup>\*b</sup>

*a. School of Chemistry and Chemical Engineering, South China University of Technology, Guangzhou 510640, PR China*

*b. Hoffmann Institute of Advanced Materials, Shenzhen Polytechnic University, 7098 Liuxian Blvd., Nanshan, Shenzhen 518055, China*

*c. School of Chemistry, University of Manchester, Manchester M13 9PL, United Kingdom*

*d. Beijing National Laboratory for Molecular Sciences, College of Chemistry and Molecular Engineering, Peking University, Beijing 100871, China*

*e. Department of Chemistry and Chemical Biology, Rutgers University, 123 Bevier Road, Piscataway, NJ 08854, United States*

## Experimental details

### Synthesis of 4',4''',4''''',4''''''-(Ethene-1,1,2,2-tetrayl)tetrakis([1,1'-biphenyl]-3,5-dicarboxylic acid) (H8ettbpcd)

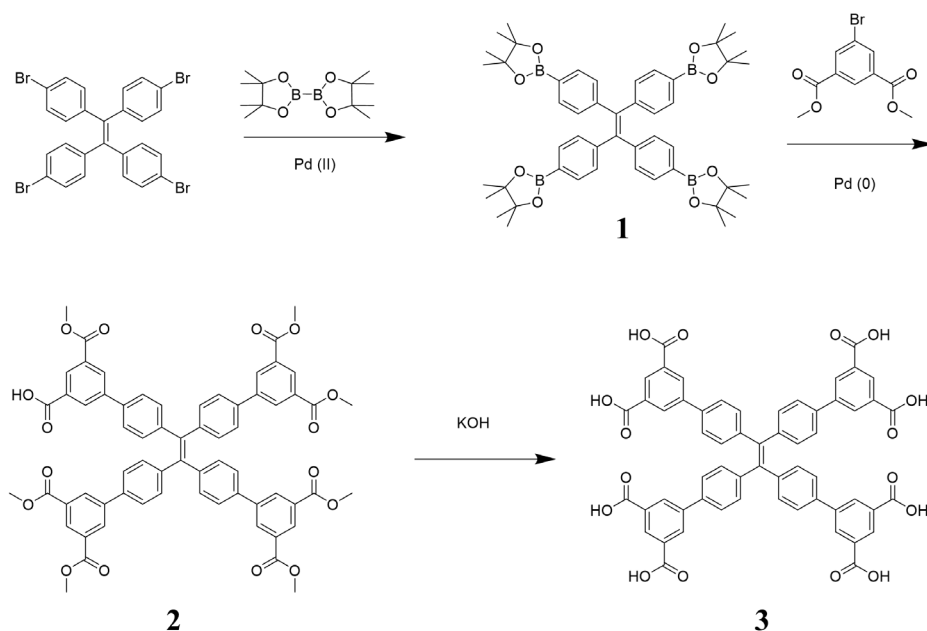

**Figure S1.** Synthesis of 4',4''',4''''',4''''''-(Ethene-1,1,2,2-tetrayl)tetrakis([1,1'-biphenyl]-3,5-dicarboxylic acid)

A 100 mL round-bottom flask was charged with 1,1,2,2-tetrakis(4-bromophenyl) ethylene (6.48 g, 10.0 mmol), bis(pinacolato)diboron (15.2 g, 60.0 mmol), [1,1'-Bis(diphenylphosphino)ferrocene] dichloro palladium (II) (1.46 mg, 2.0 mmol), and potassium acetate (7.8 g, 80.0 mmol). The solids were evacuated under high pressure for 15 minutes. Then, dioxane (40 mL) was added and the reaction mixture allowed to reflux for 48 hours under N<sub>2</sub>. After the consumption of 1,1,2,2-tetrakis(4-bromophenyl) ethylene, the reaction mixture was cooled to room-temperature and then poured into ice-water to produce a yellow precipitate. The precipitate was filtered and washed several times with water and purified using flash column chromatography with THF/hexane as eluent. The isolate solid was finally recrystallized with dioxane to give **1** as yellow crystals (65% yield). <sup>1</sup>H NMR (400 MHz, CDCl<sub>3</sub>) δ 7.53 (t, J = 7.8 Hz, 8H), 7.01 (d, J = 7.9 Hz, 8H), 1.34 (s, 49H).

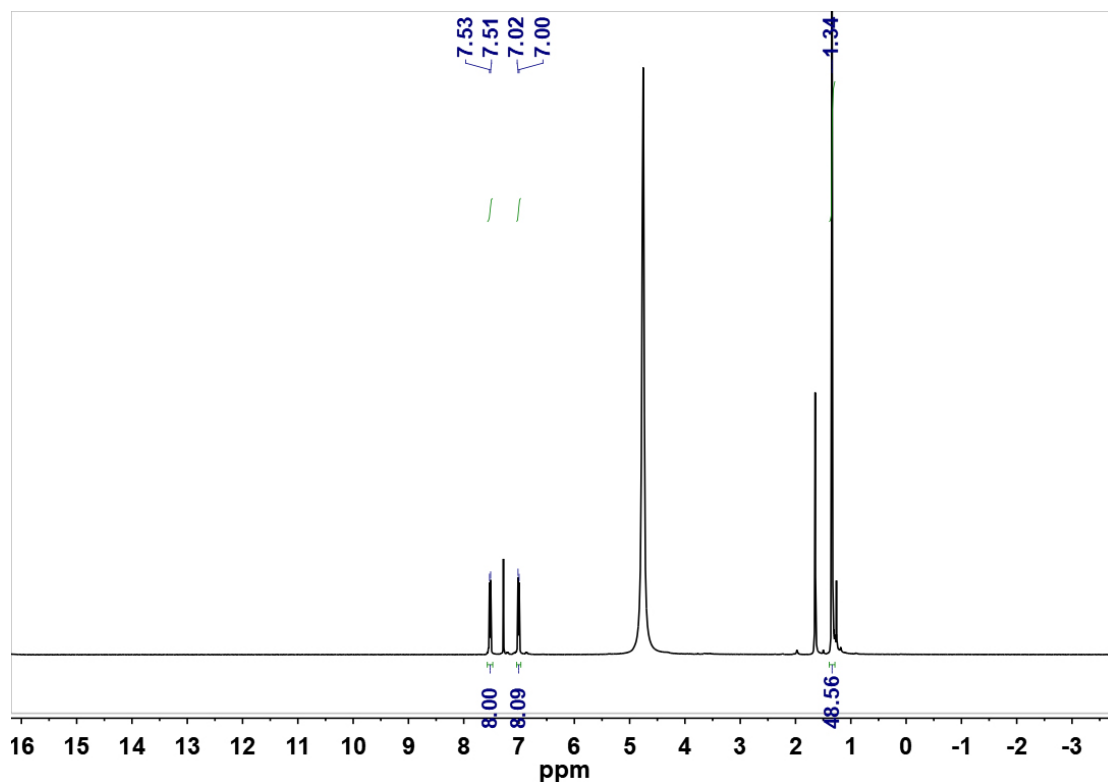

**Figure S2.**  $^1\text{H}$  NMR spectrum of compound 1.

Compound **1** (4.2 g, 5.0 mmol), dimethyl 5-bromoisophthalate (6.8 g, 25.0 mmol) and  $\text{K}_2\text{CO}_3$  (6.9 g, 50.0 mmol) were added to a mixture of toluene and methanol (4 : 1), and the mixture was stirred under  $\text{N}_2$  for 15 min.  $\text{Pd}(\text{PPh}_3)_4$  (1.2 g, 1 mmol) was added to the reaction mixture with stirring, and the mixture heated to  $80\text{ }^\circ\text{C}$  for 3 days under  $\text{N}_2$ . Afterward it was concentrated under reduced pressure. The crude product was purified by column chromatography to obtain the product **2** as white solid (72% yield).  $^1\text{H}$  NMR (400 MHz,  $\text{CDCl}_3$ )  $\delta$  8.64 (s, 4H), 8.47 (s, 8H), 7.52 (d,  $J = 8.0$  Hz, 8H), 7.26 (d,  $J = 8.1$  Hz, 15H), 3.97 (s, 24H).

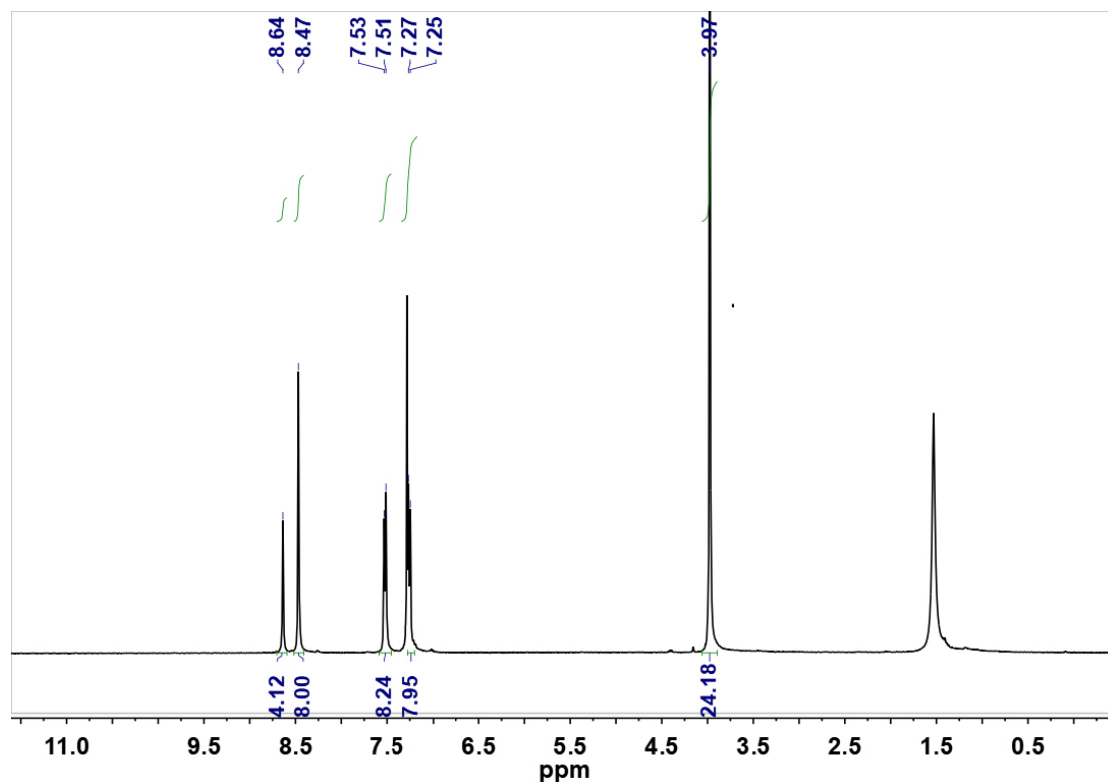

**Figure S3.**  $^1\text{H}$  NMR spectrum of compound **2**.

Compound **2** (2.7 g, 2.5 mmol) was dissolved in 50 ml of THF, to which 50 ml of 10 M NaOH aqueous solution was added. The mixture was stirred under reflux for 10 h, and then the organic solvent was concentrated under reduced pressure. Then 100 mL of water was added to the residues and aqueous phase was acidified to pH = 2 using 6 M HCl aqueous solution. The resulting precipitate was collected via filtration, washed with water (200 ml) and dried under vacuum to afford **3** as white solid. (92% yield).  $^1\text{H}$  NMR (400 MHz, DMSO)  $\delta$  13.41 (s, 8H), 8.42 (s, 4H), 8.34 (s, 8H), 7.63 (d,  $J$  = 8.3 Hz, 8H), 7.23 (d,  $J$  = 8.2 Hz, 8H).

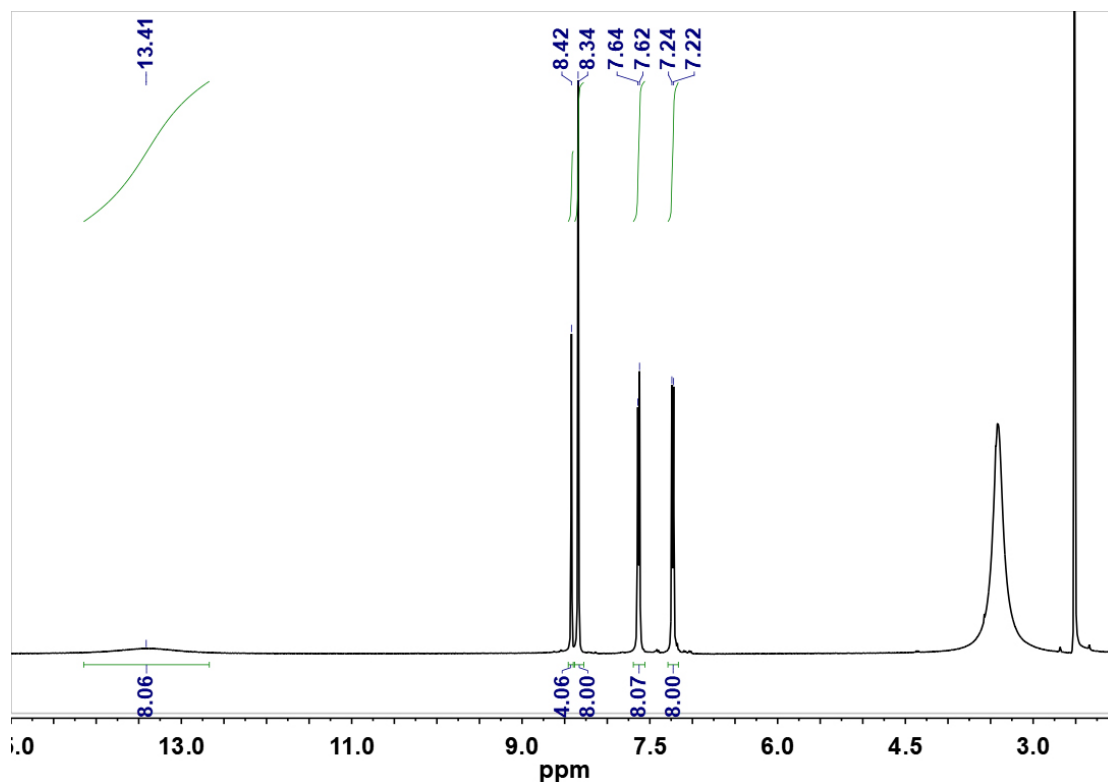

**Figure S4.**  $^1\text{H}$  NMR spectrum of compound 3.

**Synthesis of HIAM-330:** HIAM-330 was prepared via solvothermal reaction.  $\text{Al}(\text{NO}_3)_3 \cdot 9\text{H}_2\text{O}$  (40 mg) and 4',4''',4''''',4''''''-(Ethene-1,1,2,2-tetrayl)tetrakis([1,1'-biphenyl]-3,5-dicarboxylic acid) (20 mg) were added to a mixed solvent of DMF/Acetonitrile/formic acid/ (3.5/1.5/2.5 mL) and the mixture was stirred at room temperature for 1 hour before being transferred to a 20 mL Teflon bomb (Xi'an Taikang Technology Co., Ltd.). The Teflon bomb was placed in an oven preset at  $150^\circ\text{C}$  for 3 days. Colorless crystals were obtained after the reaction was cooled to room temperature.

**General characterizations:** Single-crystal X-ray diffraction data were collected at 150 K on a Bruker APEX-II CCD diffractometer using  $\text{GaK}\alpha$  radiation tuned to  $\lambda = 1.34139 \text{ \AA}$ . The structure was solved by direct methods and refined by full-matrix least-squares on  $F^2$  using the Bruker SHELXTL package. Powder X-ray diffraction patterns were recorded on a Bruker D8 Advance with  $\text{Cu K}\alpha$  radiation ( $\lambda = 1.5406 \text{ \AA}$ ). Data were collected at room temperature at  $2\theta = 3\text{-}40^\circ$ . Thermogravimetric analysis was carried out on a TGA550 (TA Instruments) analyzer. For each run,  $\sim 5 \text{ mg}$  of sample was heated from room temperature to  $600^\circ\text{C}$  at a ramp rate of  $10^\circ\text{C}/\text{min}$ .

**Adsorption isotherms measurements:** Nitrogen adsorption at 77 K was measured on a Micromeritics 3Flex analyzer, The single-component adsorption isotherms of CO<sub>2</sub>, CH<sub>4</sub>, and N<sub>2</sub> at 288, 298 and 308 K were measured using a Micromeritics 3Flex Analyzer. The SO<sub>2</sub> adsorption isotherms at 288, 298 and 308 K were collected using a BSD-PMC corrosive gas adsorption analyzer (Beishide Instrument Technology (Beijing) Co., Ltd.).

**Column breakthrough measurements:** All breakthrough tests were performed in dynamic gas breakthrough equipment and conducted using a stainless-steel column (6 mm inner diameter × 100mm) manually packed with 0.33 g and 1.31 g active HIAM-330 powder for SO<sub>2</sub>/N<sub>2</sub> and SO<sub>2</sub>/CO<sub>2</sub> breakthrough measurements, respectively. The column was first purged with He flow (20 mL min<sup>-1</sup>) for 6 hours at 423 K. The fixed bed was then cooled to room temperature using a temperature programmed water bath. The breakthrough experiment of SO<sub>2</sub>/N<sub>2</sub> was performed with a stream of SO<sub>2</sub>/N<sub>2</sub> mixture (2500 ppm SO<sub>2</sub>, 75 % N<sub>2</sub> in He, total flow rate: 20 mL/min) and the breakthrough experiment of SO<sub>2</sub>/CO<sub>2</sub> was performed with SO<sub>2</sub>/CO<sub>2</sub> mixture (2500 ppm SO<sub>2</sub>, 15 % CO<sub>2</sub> in He, total flow rate: 20 mL/min) at atmospheric pressure and room temperature. The flow rate of the entering gas mixture was maintained at 20 mL min<sup>-1</sup>. and the gas concentration of SO<sub>2</sub>, N<sub>2</sub> and CO<sub>2</sub> at the outlet was determined by mass spectrometry and compared with the corresponding inlet concentration F<sub>0</sub>, where F/F<sub>0</sub> = 1 indicates complete breakthrough.

**Rietveld refinements of the high-resolution synchrotron PXRD measurements:** High-resolution synchrotron powder X-ray diffraction pattern for SO<sub>2</sub>-loaded HIAM-330 was collected at the Beamline I11 of Diamond Light Source (DLS) using position sensitive detector (PSD) and a monochromated radiation ( $\lambda = 0.824388 \text{ \AA}$ ). The SO<sub>2</sub> dosing procedure °C the lab using a Schlenk line. The powdery sample was ground and packed into 0.7 mm borosilicate capillary and activated under dynamic vacuum at 423K overnight. The packed capillary was then exposed to 1 bar of SO<sub>2</sub> and left for 30 min for equilibration. Diffraction patterns were then collected at room temperature using the high-throughput mode available at I11. Rietveld structure refinement on the high-resolution patterns was carried out using the TOPAS package. Pawley refinement was first conducted to obtain the refined non-structural parameters, including background, peak shape, and lattice parameters. The structure model from the single-crystal diffraction result was used and atom sites were fixed at the beginning of refinement. The atomic displacement parameters (ADPs) are defined using element-wise isotropic parameters. The organic linker was described using a semi-rigid model where the C–C bond distance was allowed to vary within a chemically reasonable

range. The phenyl ring moieties were allowed to rotate along their  $C_2$  axis to account for guest-induced re-orientation. The  $SO_2$  molecule was described using the rigid body model with bond distance and angles from the Computational Chemistry Comparison and Benchmark DataBase (CCCBDB). The initial center of masses and orientations of the  $SO_2$  molecules were determined using the simulated annealing (SA) method. All structural and lattice parameters were released to be refined in the final stage, and structure solutions were accepted with good agreement factors.

**Adsorption selectivity calculation:** The dual site Langmuir-Freundlich isotherm model was adopted to fit the adsorption isotherms of  $SO_2$ ,  $CO_2$ ,  $N_2$  and  $CH_4$  on HIAM-330, which was described as follows:

$$q = q_{A,sat} \frac{b_A p^{v_A}}{1 + b_A p^{v_A}} + q_{B,sat} \frac{b_B p^{v_B}}{1 + b_B p^{v_B}} \quad (1)$$

with T-dependent parameters  $b_A$ , and  $b_B$

$$b_A = b_{AO} \exp\left(\frac{E_A}{RT}\right); b_B = b_{BO} \exp\left(\frac{E_B}{RT}\right) \quad (2)$$

where  $q$  represents the adsorption amount of adsorbents with units of  $\text{mol} \cdot \text{kg}^{-1}$ ,  $q_{A,sat}$  and  $q_{B,sat}$  represents the saturated adsorption amount for adsorption sites A and B, respectively,  $b_A$  and  $b_B$  are constants for species  $i$  at adsorption sites A and B, respectively,  $p$  is the total pressure of the bulk gas at the adsorption equilibrium, and  $v_A$  and  $v_B$  are the Freundlich exponent for sites A and B, respectively.

To calculate the adsorption selectivity for the  $SO_2/CO_2$ ,  $SO_2/CH_4$  and  $SO_2/N_2$  mixtures on HIAM-330, the IAST selectivity is defined by:

$$S_{ads} = \frac{q_1/q_2}{y_1/y_2} \quad (3)$$

where  $q_1$  and  $q_2$  represent the adsorption amounts of  $SO_2$  and  $CO_2$ ,  $CH_4$  or  $N_2$  upon the sample under equilibrium conditions, which is usually expressed with units of  $\text{mmol} \cdot \text{g}^{-1}$ ,  $y_1$  and  $y_2$  are the corresponding mole fractions in the gas phase for the mixtures.

**Isosteric heat of adsorption calculation:** To determine the affinity between the scaffold and the adsorbates, the Virial equation was employed to calculate the adsorption heat  $Q_{st}$  for  $SO_2$  and  $CO_2$  using adsorption isotherm at 273, 283 and 298 K, which was defined as follows:

$$\ln(P) = \ln(N) + \frac{1}{T} \sum_{i=0}^m a_i N_i + \sum_{i=0}^n b_i N_i \quad (4)$$

$$Q_{st} = -R \sum_{i=0}^m a_i N_i \quad (5)$$

where  $N$  is the adsorption amount, and  $m$  and  $n$  determine the number of items required to precisely fit the adsorption isotherms.



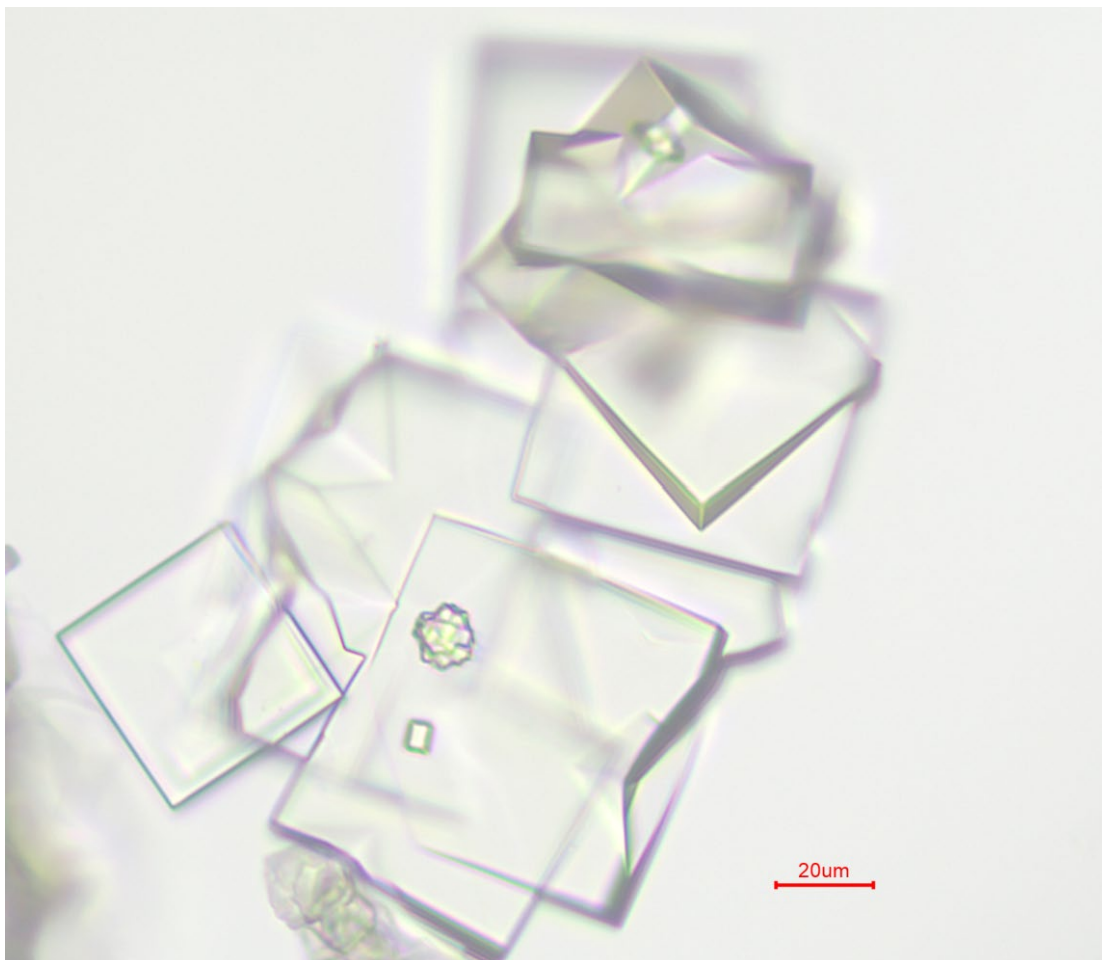

**Figure S5.** Optical image of the as-synthesized crystals of HIAM-330.

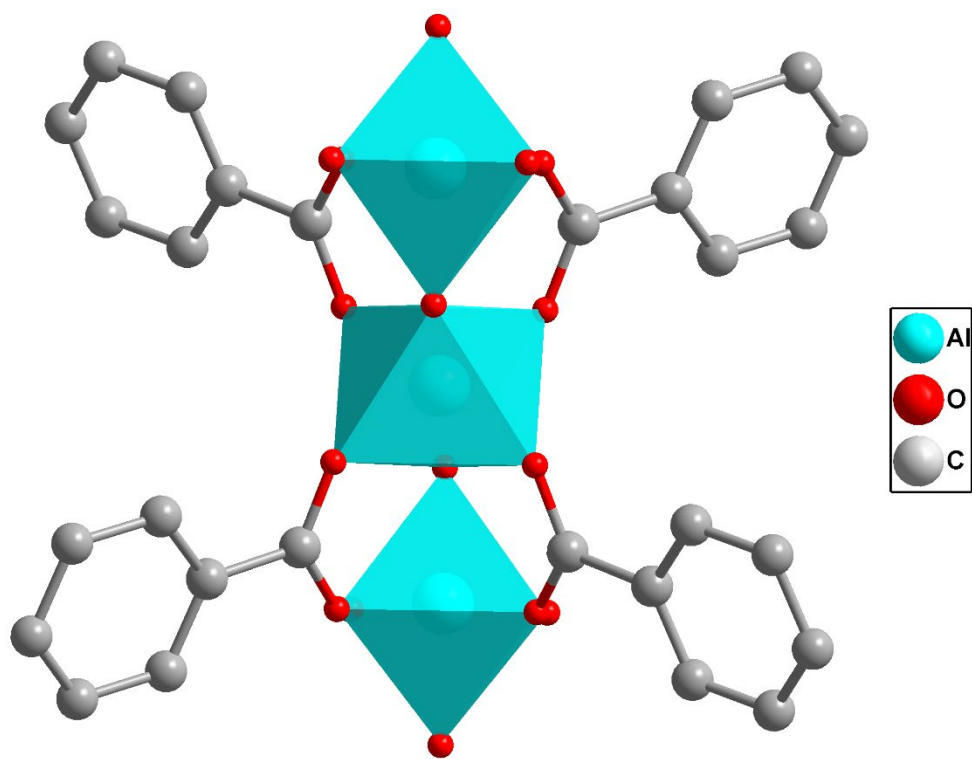

**Figure S6.** Coordination of trinuclear aluminum cluster in the structure of HIAM-330.

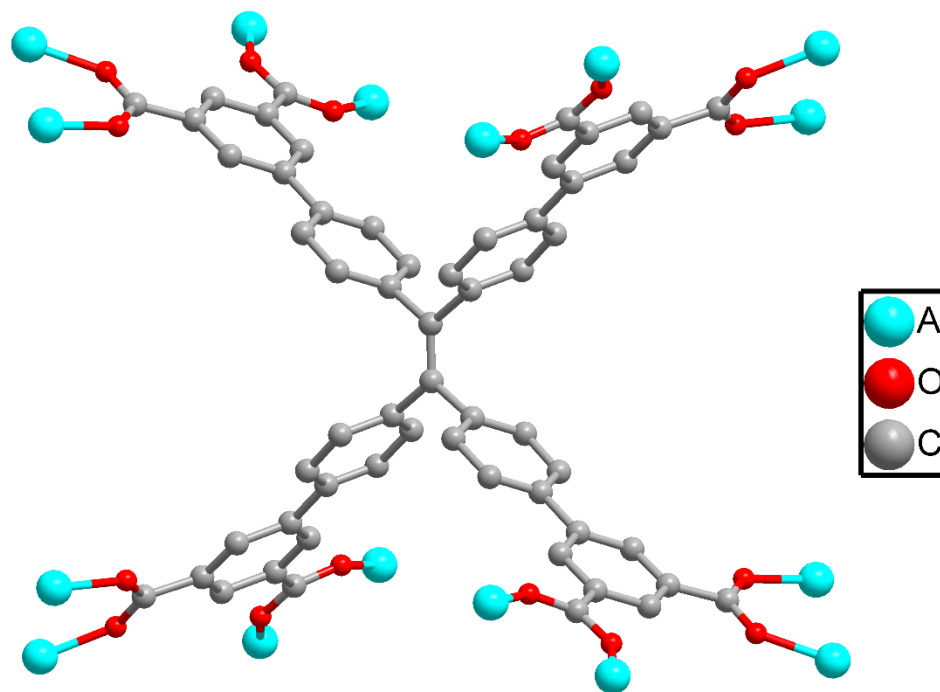

**Figure S7.** Coordination of octacarboxylate ligand the structure of HIAM-330.

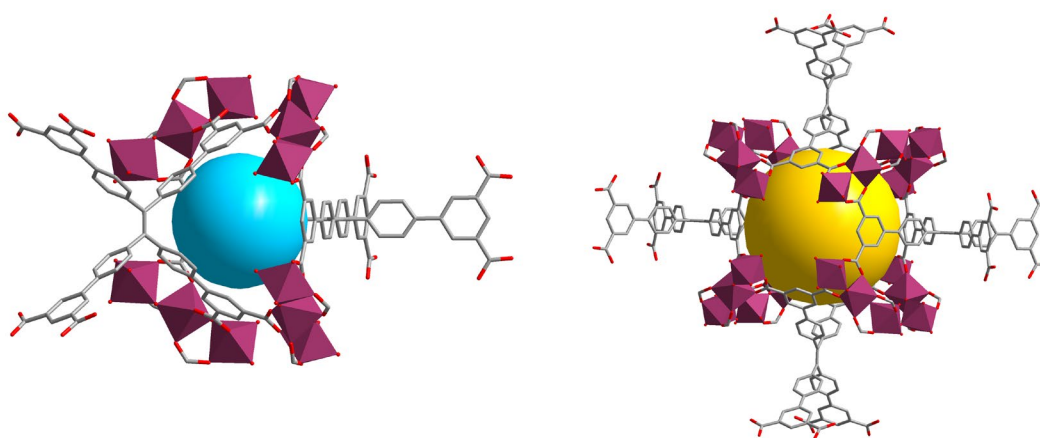

**Figure S8.** Representation of two types of cages in HIAM-330.

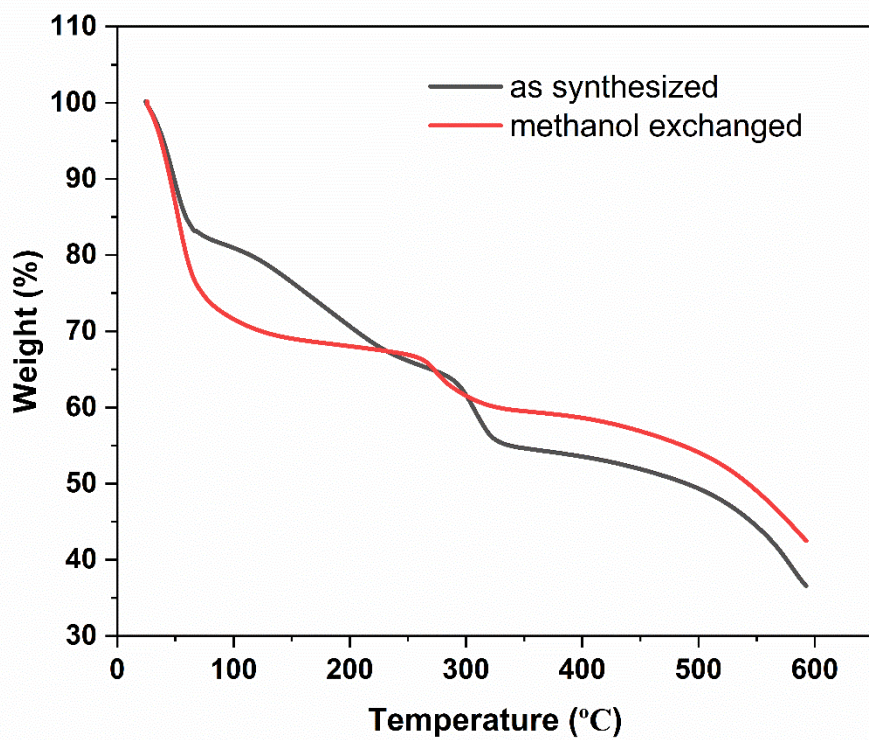

Figure S9. TG curve of as synthesized and methanol exchanged HIAM-330.

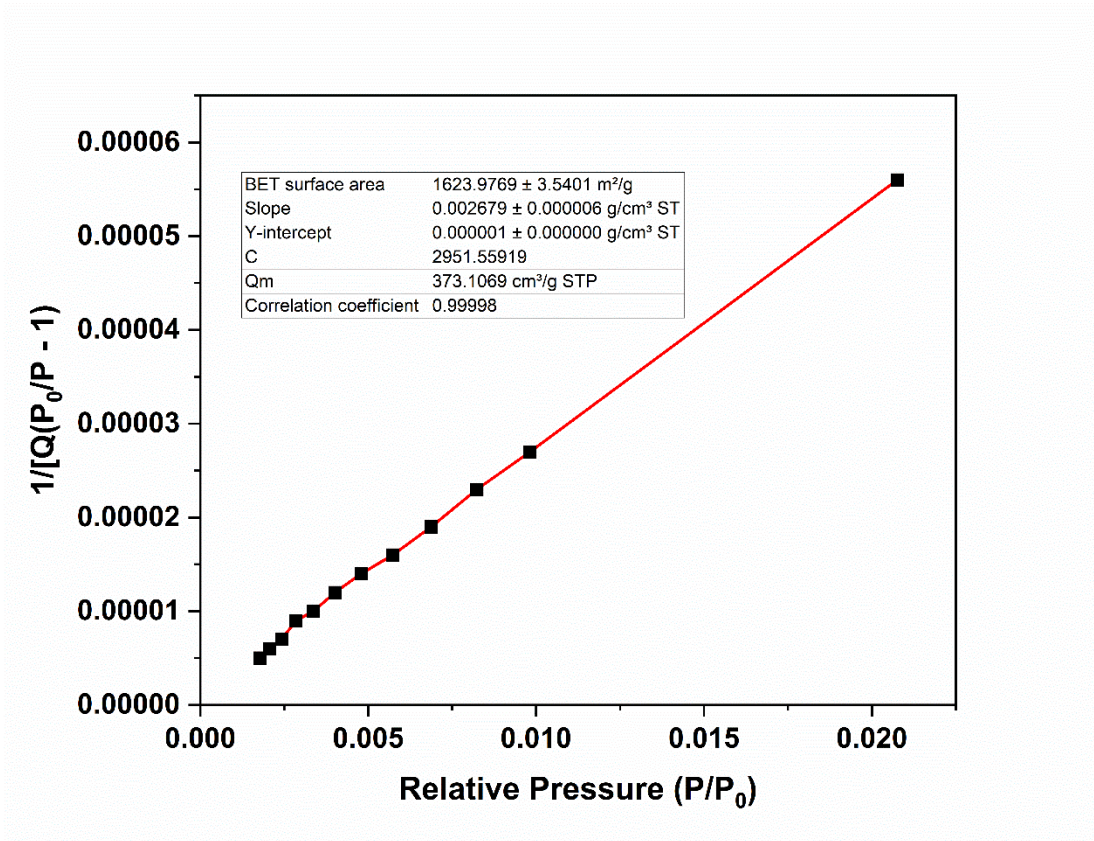

Figure S10. The BET fitting of HIAM-330 obtained from the N<sub>2</sub> adsorption isotherm at 77K.

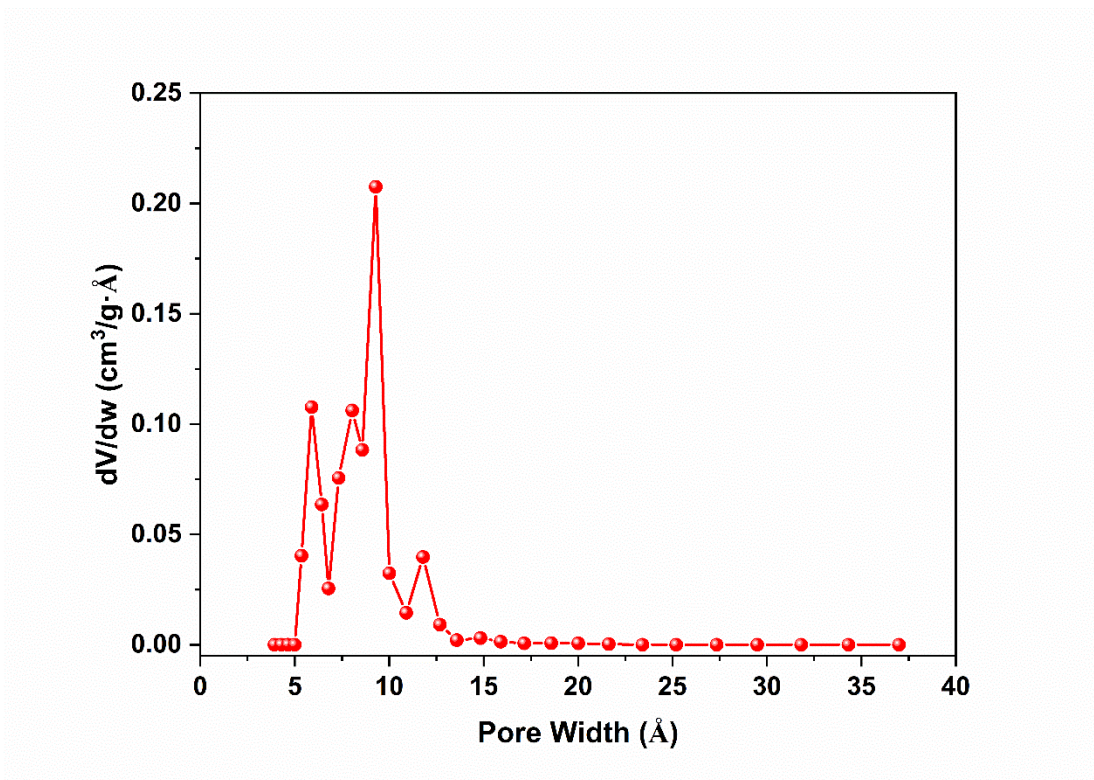

**Figure 11.** Pore size distribution (DFT model) calculated from N<sub>2</sub> adsorption at 77 K.



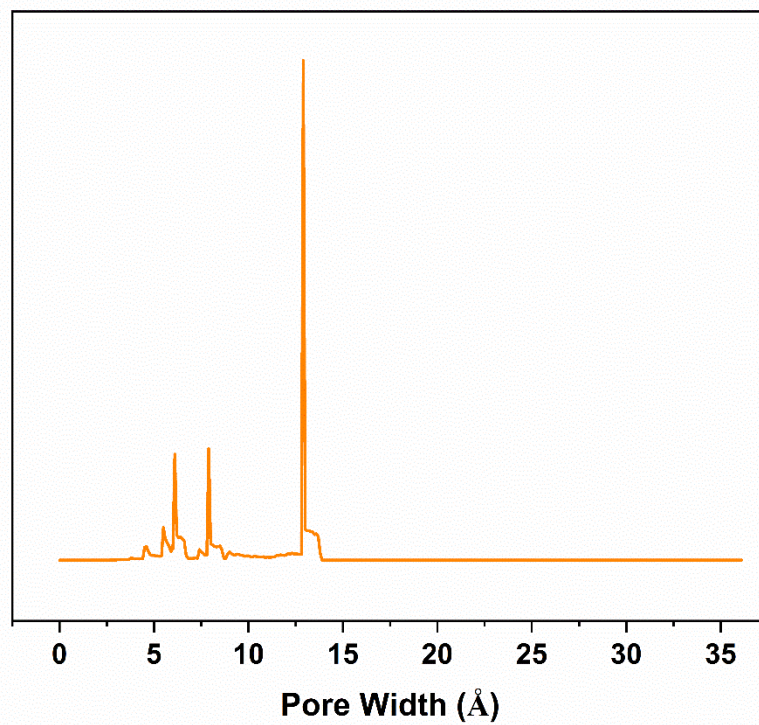

**Figure S12.** Pore size based on Zeo++ calculation with the crystal structure.

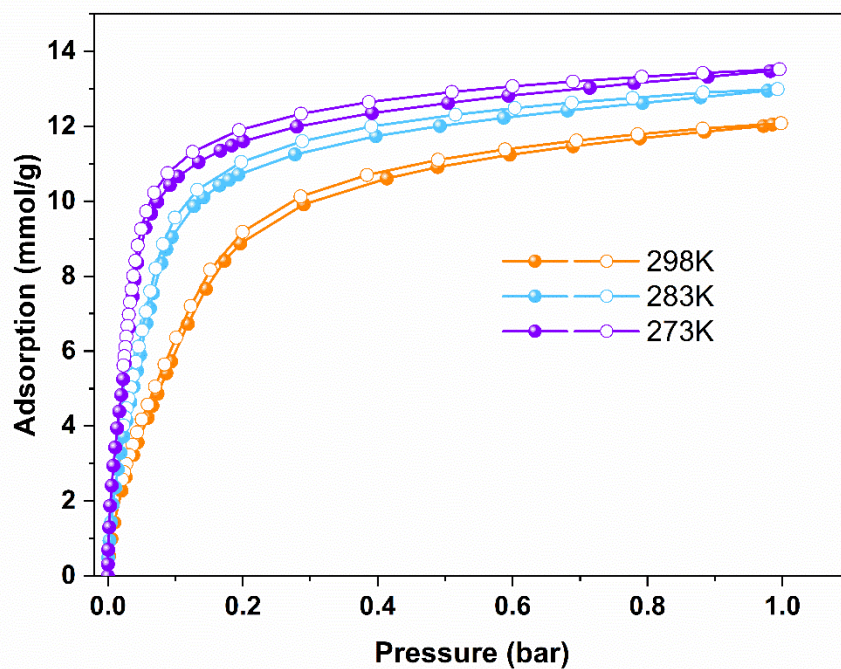

Figure S13. Adsorption isotherms of SO<sub>2</sub> on HIAM-330 at 298, 283, and 273K.



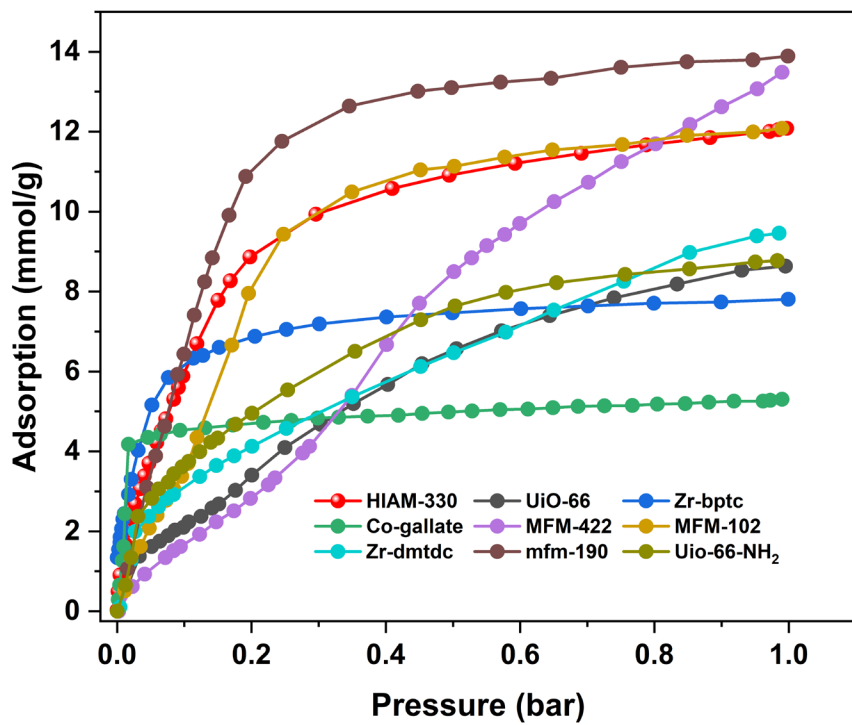

**Figure S14.** Adsorption isotherms of SO<sub>2</sub> on HIAM-330 and representative adsorbents at 298K and 1 bar.

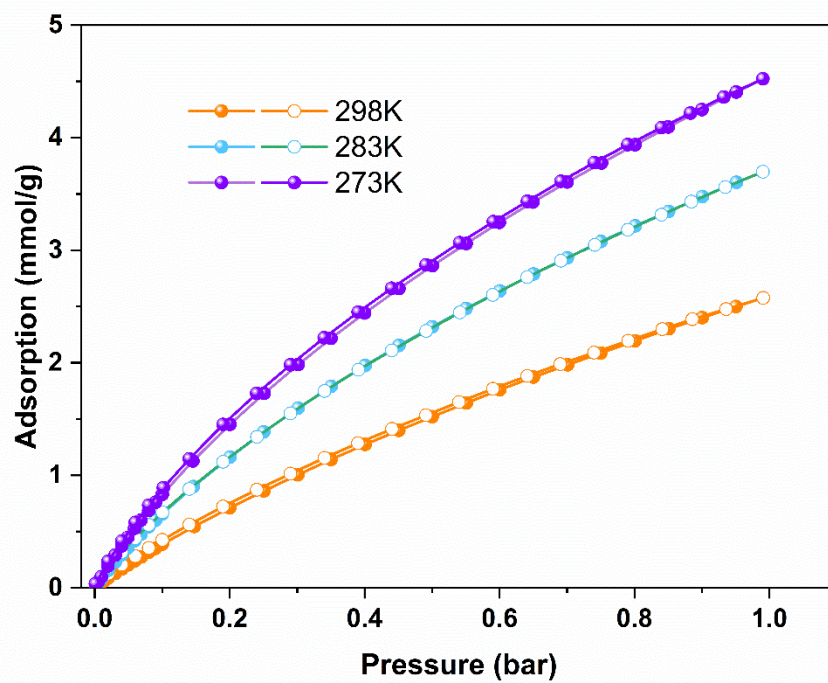

Figure S15. Adsorption isotherms of CO<sub>2</sub> on HIAM-330 at 298, 283, and 273K.

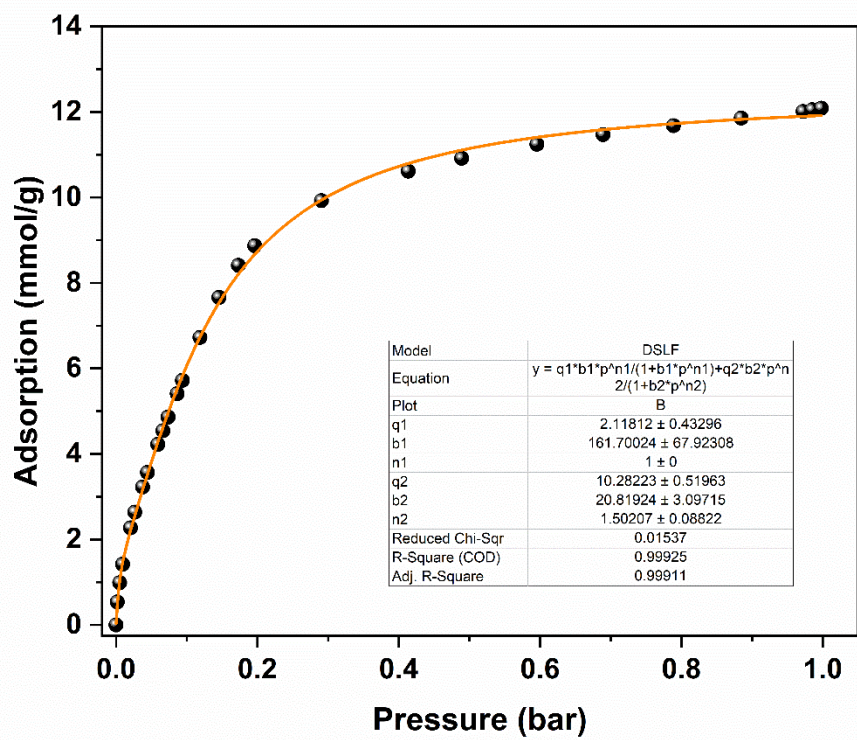

Figure S16. Fitting (lines) of SO<sub>2</sub> adsorption isotherms (points) of HIAM-330 at 298K.

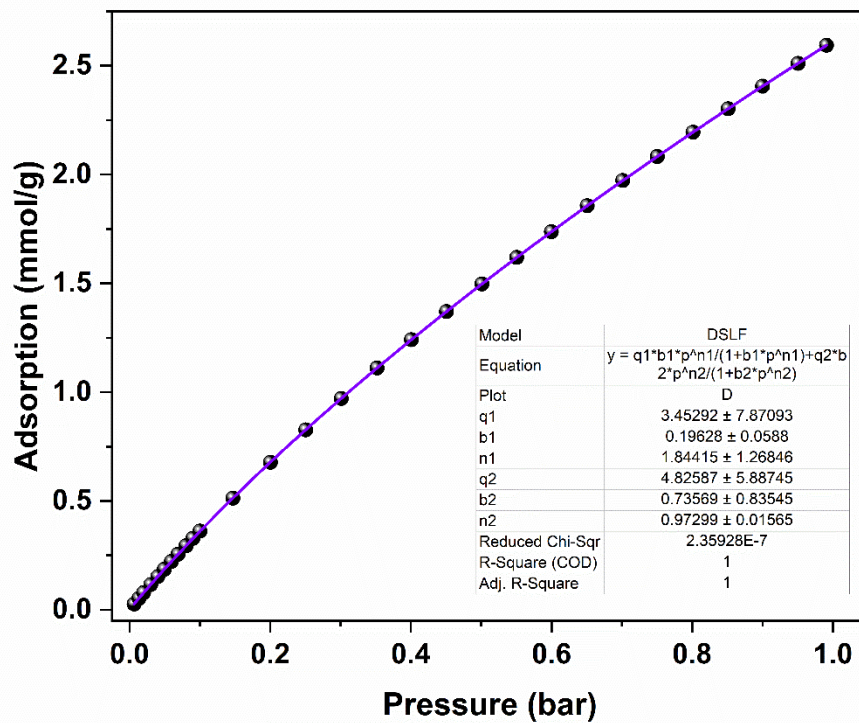

Figure S17. Fitting (lines) of CO<sub>2</sub> adsorption isotherms (points) of HIAM-330 at 298K.

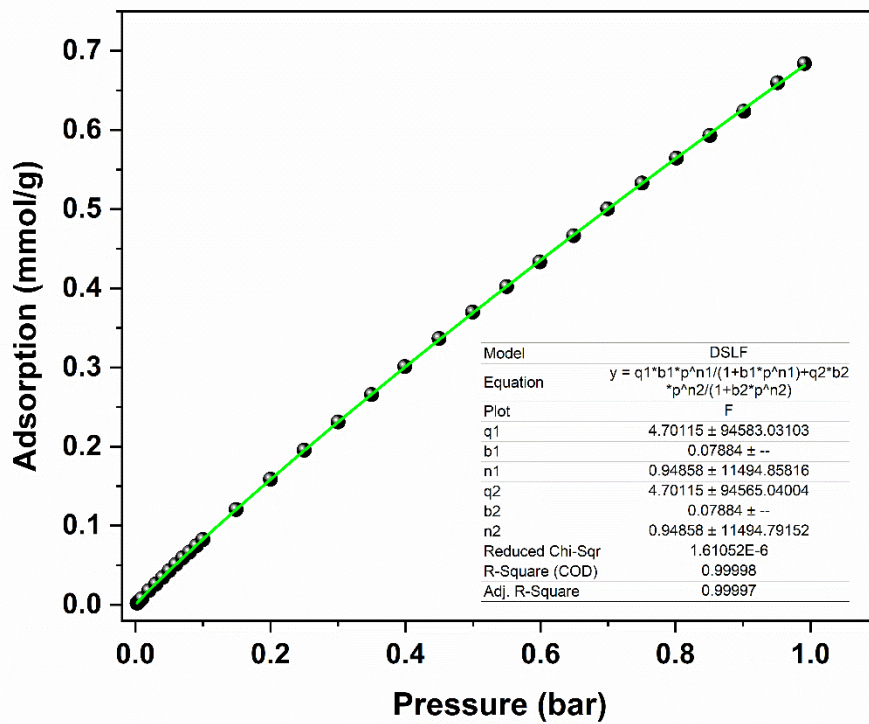

Figure S18. Fitting (lines) of CH<sub>4</sub> adsorption isotherms (points) of HIAM-330 at 298K.

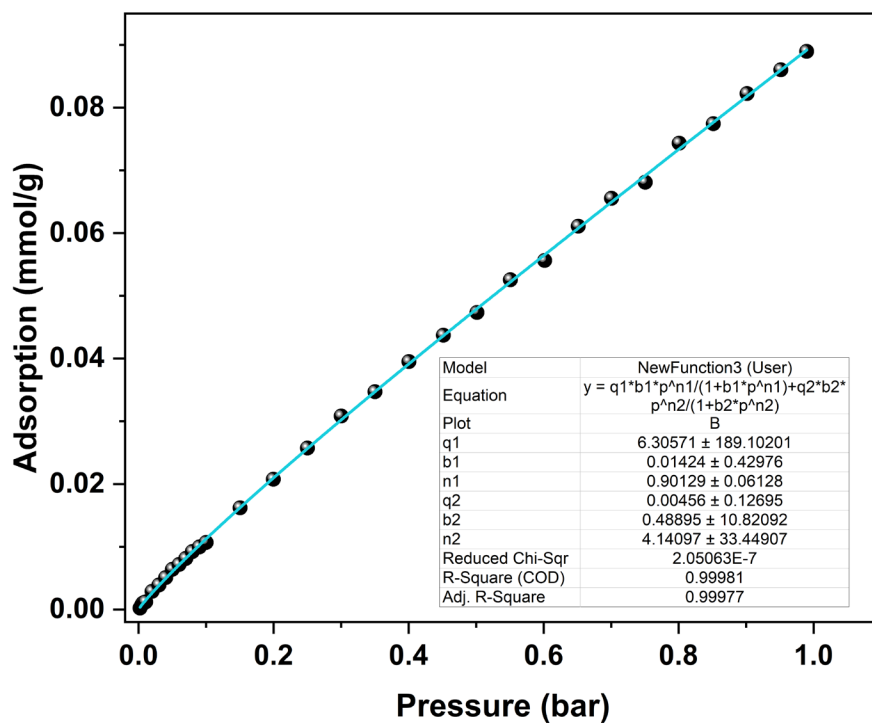

**Figure S19.** Fitting (lines) of N<sub>2</sub> adsorption isotherms (points) of HIAM-330 at 298K.

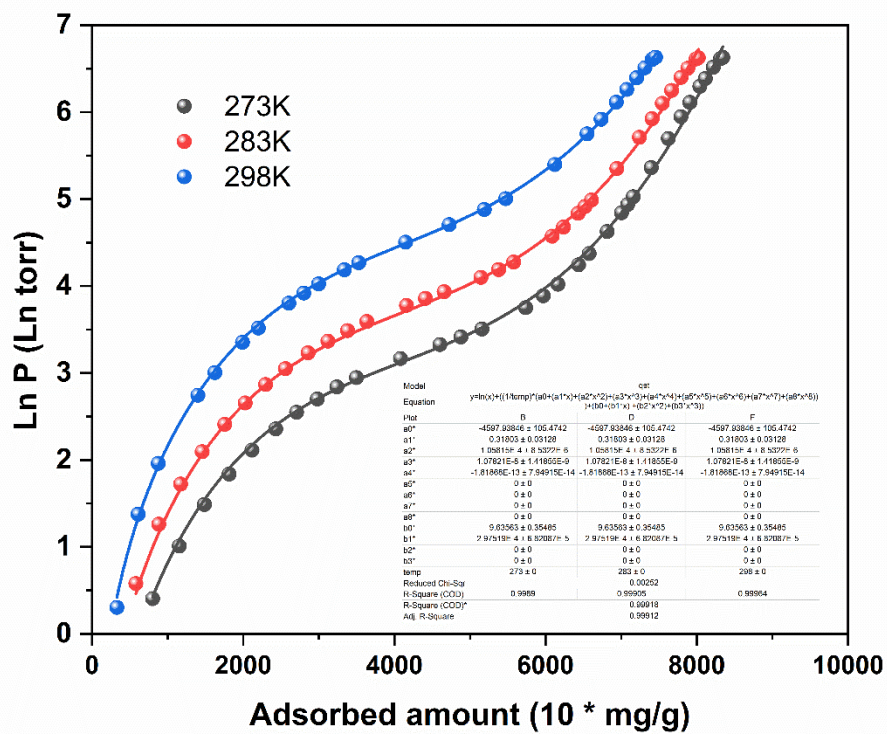

Figure S20. Virial fitting (lines) of SO<sub>2</sub> adsorption isotherms (points) of HIAM-330.

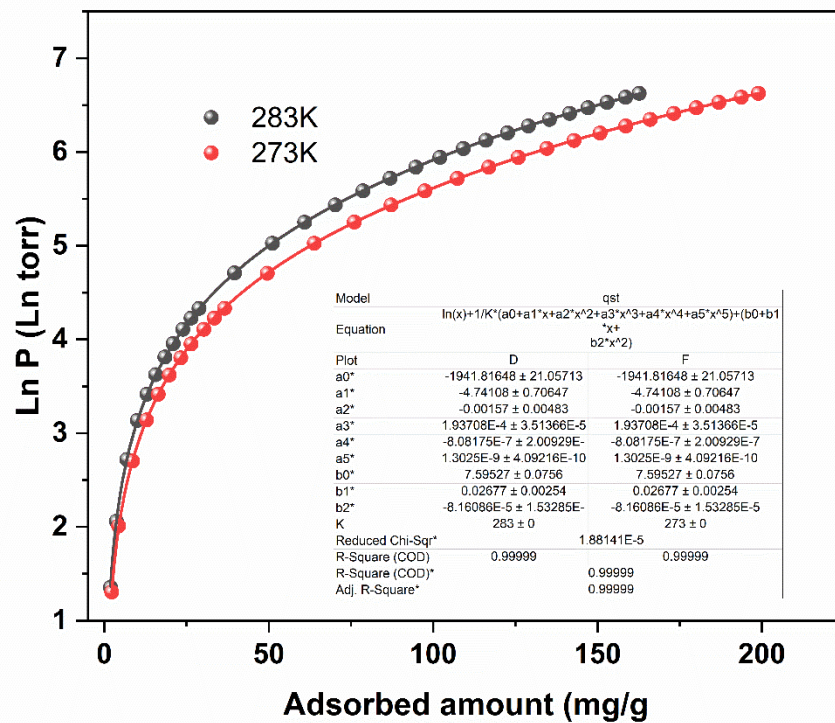

Figure S21. Virial fitting (lines) of CO<sub>2</sub> adsorption isotherms (points) of HIAM-330.



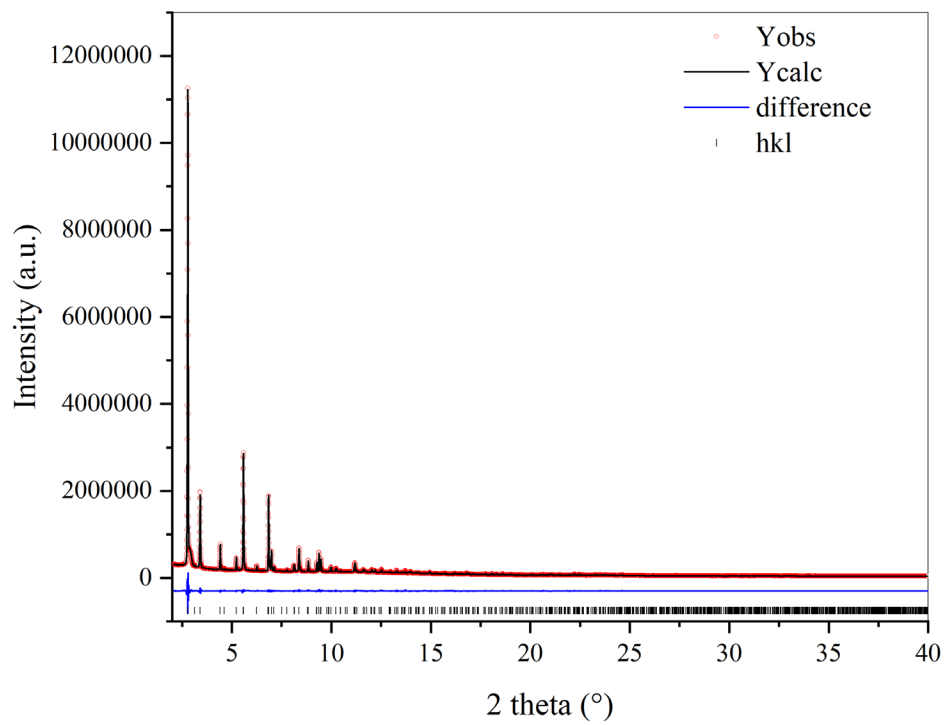

**Figure S22.** Rietveld refinements of the high-resolution XRD data of SO<sub>2</sub>-loaded HIAM-330.

**Table S1.** Crystal data and structure refinement for HIAM-330

|                                             |                                                                 |
|---------------------------------------------|-----------------------------------------------------------------|
| Identification code                         | HIAM-330                                                        |
| Empirical formula                           | C <sub>29</sub> H <sub>26</sub> Al <sub>3</sub> O <sub>16</sub> |
| Formula weight                              | 711.44                                                          |
| Temperature/K                               | 150.00                                                          |
| Crystal system                              | tetragonal                                                      |
| Space group                                 | I4/mmm                                                          |
| a/Å                                         | 21.5005(6)                                                      |
| b/Å                                         | 21.5005(6)                                                      |
| c/Å                                         | 28.4908(11)                                                     |
| α/°                                         | 90                                                              |
| β/°                                         | 90                                                              |
| γ/°                                         | 90                                                              |
| Volume/Å <sup>3</sup>                       | 13170.5(9)                                                      |
| Z                                           | 8                                                               |
| ρ <sub>calc</sub> /cm <sup>3</sup>          | 0.718                                                           |
| μ/mm <sup>-1</sup>                          | 0.553                                                           |
| F(000)                                      | 2936.0                                                          |
| Crystal size/mm <sup>3</sup>                | 0.12 × 0.1 × 0.02                                               |
| Radiation                                   | GaKα (λ = 1.34139)                                              |
| 2θ range for data collection/°              | 8.444 to 102.56                                                 |
| Index ranges                                | -24 ≤ h ≤ 10, -13 ≤ k ≤ 23, -33 ≤ l ≤ 25                        |
| Reflections collected                       | 20369                                                           |
| Independent reflections                     | 3020 [R <sub>int</sub> = 0.0343, R <sub>sigma</sub> = 0.0236]   |
| Data/restraints/parameters                  | 3020/0/143                                                      |
| Goodness-of-fit on F <sup>2</sup>           | 1.107                                                           |
| Final R indexes [I ≥ 2σ (I)]                | R <sub>1</sub> = 0.0790, wR <sub>2</sub> = 0.2365               |
| Final R indexes [all data]                  | R <sub>1</sub> = 0.0857, wR <sub>2</sub> = 0.2435               |
| Largest diff. peak/hole / e Å <sup>-3</sup> | 0.91/-0.43                                                      |
